# Supplementary material for: Development of a clinical-radiological nomogram for predicting severe postoperative peritumoral brain edema following intracranial meningioma resection
Source: Research Square preprint supplement (doi:10.21203/rs.3.rs-4901798/v1), 2024-09-19
Supplement: Supplementary file 1 [file 7e6180c16579266fdfe68f37.xlsx]

## Sheet: Sheet1
characteristics	Univariate Analysis				Multivariate Analysis
	β coefficient	OR	95% CI	P-value	β coefficient	OR	95% CI	P-value
Gender	-0.381	0.683	0.683(0.275-1.62)	0.397
Age	0.024	1.024	1.024(0.992-1.06)	0.158
headache	-0.223	0.8	0.8(0.335-1.855)	0.607
Dizziness	-0.14	0.87	0.87(0.347-2.085)	0.758
vomit	0.095	1.1	1.1(0.221-4.47)	0.898
limb weakness	-0.549	0.578	0.578(0.175-1.636)	0.327
found.by.medical.examination	-14.814	0	0(NA-5.031)	0.989
diabetes	0.417	1.517	1.517(0.365-5.719)	0.542
hypertension	0.513	1.67	1.67(0.727-3.865)	0.227
heart.disease	16.377	1.29551e+07	12955(0-NA)	0.991
brain trauma	0.797	2.219	2.219(0.086-57.29)	0.577
epilepsy	-0.795	0.452	0.452(0.066-1.886)	0.328
number of large blood artery responsible for tumor blood supply	-0.755	0.47	0.47(0.196-0.961)	0.058	-2.752	0.064	0.063 (0.008-0.293)	0.002
Extracarotid.artery..tumor.blood.supply.	-0.2	0.818	0.818(0.351-1.94)	0.644
vertebral.artery..tumor.blood.supply.	-0.035	0.966	0.966(0.245-3.233)	0.956
internal.carotid.artery..tumor.blood.supply.	0.194	1.214	1.214(0.491-2.917)	0.667
drainage.of.venous.disturbance	0.262	1.3	1.3(0.524-3.14)	0.563
venous.sinus.disturbance	0.193	1.213	1.213(0.477-2.978)	0.677
The.intensity.of.tumor.enhancement.on.MRI	0.003	1.003	1.003(1.001-1.005)	0.002	0.003	1.003	1.003 (1.000-1.006)	0.024
Peritumoral.Hypointensity.on.T2.Weighted.MRI	0.757	2.133	2.133(0.929-5.003)	0.076
meningoceal.signs	0.33	1.391	1.391(0.171-28.72)	0.779
operation.time..hour..	-0.098	0.907	0.907(0.76-1.067)	0.255
Foramen.magnum	-14.8	0	0(NA-2.362)	0.992
Anterior.fossa.base	-14.814	0	0(NA-5.031)	0.989
Fossae.temporalis	0.806	2.24	2.24(0.763-6.518)	0.136
Occipital.lobe	-0.87	0.419	0.419(0.021-2.739)	0.436
Sphenoid.ridge	0.223	1.25	1.25(0.357-3.967)	0.711
petroclival	-0.33	0.719	0.719(0.035-5.862)	0.779
Cavernous.sinus	0.531	1.7	1.7(0.319-8.172)	0.504
paracele	-14.814	0	0(NA-5.031)	0.989
Tentorium	-0.343	0.71	0.71(0.1-3.285)	0.685
Cerebellar.peduncle	-0.074	0.929	0.929(0.19-3.596)	0.919
Falx.cerebri	0.815	2.258	2.258(0.261-19.52)	0.426
Convexity	0.015	1.015	1.015(0.444-2.342)	0.971
Multiple.meningiomas	0.095	1.1	1.1(0.221-4.47)	0.898
Venous.injury	-0.78		NA(NA-NA)	＜0.01
Venous.Decompensation	1.96	7.1	7.1(0.87-146.7)	0.095
protruding.nucleoli	-14.8	0	0(NA-2.362)	0.992
Classification.of.meningioma..WHO.	-14.814	0	0(NA-5.031)	0.989
Meningoepithelial	0.844	2.325	2.325(0.83-6.481)	0.104
Angiomatous.meningioma	-0.156	0.855	0.855(0.22-2.797)	0.805
Transitional	0.442	1.556	1.556(0.48-4.753)	0.442
Fibrous	-0.916	0.4	0.4(0.151-0.975)	0.051
Microcystic	0.395	1.484	1.484(0.188-9.387)	0.674
mixed.meningioma	0.833	2.3	2.3(0.406-13.05)	0.324
Psammomatous	-0.33	0.719	0.719(0.035-5.862)	0.779
KI67	-0.011	0.989	0.989(0.846-1.144)	0.883
Postoperative.bleeding	0.405	1.5	1.5(0.657-3.469)	0.337
Preoperative.midline.displacement	0.588	1.801	1.801(0.688-4.624)	0.222
Preoperative.use.of.mannitol	0.011	1.011	1.011(0.421-2.364)	0.98
recurrence	-0.87	0.419	0.419(0.021-2.739)	0.436
Meningeal.tumor.volume	0	1	1(1-1)	0.199
Preoperative.edema.index	2.956	19.22	19.22(5.389-99.54)	＜0.01	3.648	38.402	38.40 (8.054-307.3)	＜0.01
Cystic.meningioma	0.833	2.3	2.3(0.406-13.05)	0.324
calcification	0.395	1.484	1.484(0.188-9.387)	0.674
EMA	15.843	7.59551e+06	75955(0-NA)	0.989
VIM	-0.78		NA(NA-NA)	＜0.01
S0100	-1.386	0.25	0.25(0.013-1.448)	0.2
GFAP	-14.8	0	0(NA-2.362)	0.992
P53	-1.319	0.267	0.267(0.04-1.039)	0.094
PR	0.882	2.417	2.417(0.81-8.961)	0.141
